# Supplementary material
Source: publisher figshare collection journal article supplement (https://acs.figshare.com/ndownloader/files/3703078)
Supplement: Supplementary file 1 [file 3703078]

**Supplementary Table 1.**

| Primer | Sequence                                                                                       |
|--------|------------------------------------------------------------------------------------------------|
| ICAM-1 | sense, 5'-ACC ATC TAC AGC TTT CCG GC-3'<br>antisense, 5'-GGA GAG CAC ATT CAC GGT CA-3'         |
| VCAM-1 | sense, 5'-GGC GCC TAT ACC ATC CGA AA -3'<br>antisense, 5'-TGC TTC TAC AAG ACT ATA TGA CCC C-3' |
| IL-8   | sense, 5'-CTG TGT GAA GGT GCA GTT TTG C-3'<br>antisense, 5'-CAA CCC TCT GCA CCC AGT TT-3'      |
| MCP-1  | sense, 5'-CTG CTC ATA GCA GCC ACC TT-3'<br>antisense, 5'-ACA GGA TGT CTG GGG AAA GC-3'         |
| GAPDH  | sense, 5'-GAC CCC TTC ATT GAC CTC AA-3'<br>antisense, 5'-CTT CTC CAT GGT GGT GAA GA-3'         |

**Supplementary Table 1.** Oligonucleotide primer used for RT-PCR

**Supplementary Figure 1.**

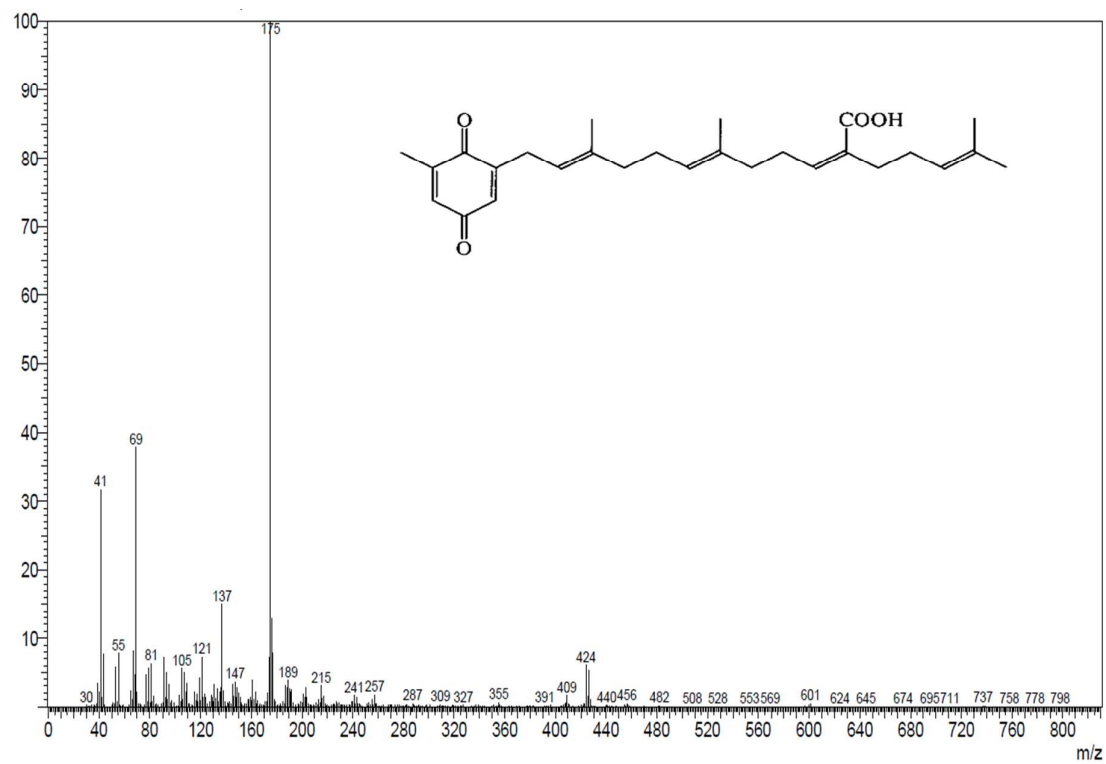

**Supplementary Figure 1.** Mass Spectrometry Analysis of SQA,  $m/z$  424.

**Supplementary Figure 2.**

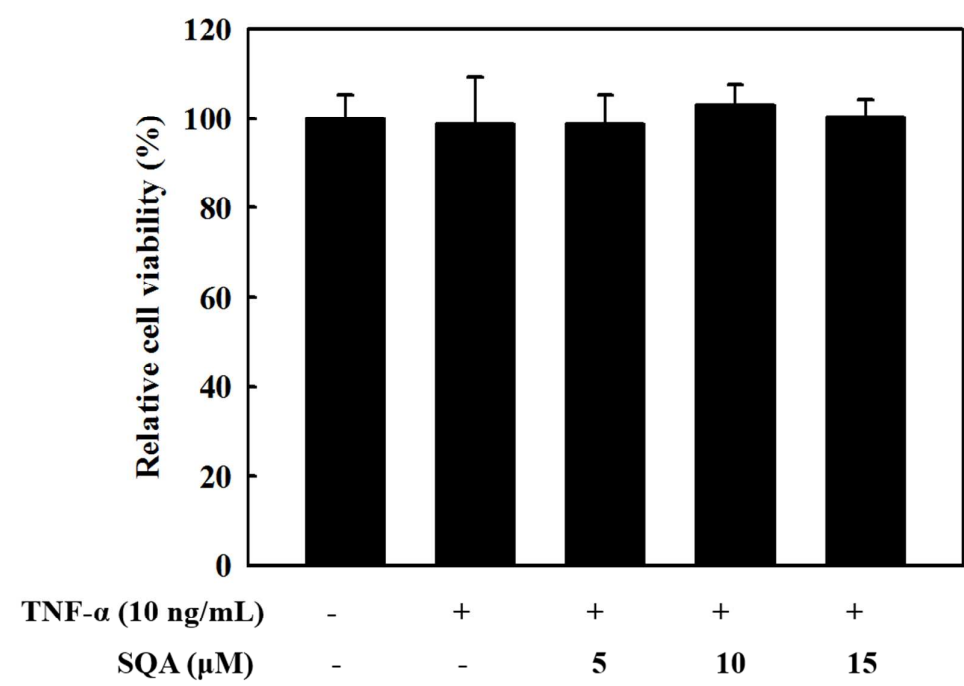

**Supplementary Figure 2.** Effect of SQA on cell viability in HUVECs. Cytotoxic effect of SQA was measured by using a 3-(4, 5-dimethylthiazol-2-yl)-5-(3-carboxymethoxyphenyl)-2-(4-sulfophenyl)-2H-tetrazolium (MTS) assay. Cells pretreated with different concentrations (5, 10, and 15  $\mu$ M) of SQA for 1 h were stimulated with TNF-  $\alpha$  (10 ng/mL) for 24 h. The values are the mean  $\pm$  S.D. of three independent experiment.
